# Supplementary material for: Effect of the degree of polymerization and water content on the thermal transport phenomena in PEGDA hydrogel: a molecular-dynamics-based study
Source: Royal Society of Chemistry journal article supplement (doi:10.1039/d3cp00667k), 2023-01-01
Supplement: d3cp00667k1.pdf [file d3cp00667k1.pdf]

## Supplementary Information

### Effect of the degree of polymerization and water content on the thermal transport phenomena in PEGDA hydrogel: A Molecular Dynamics Based Study

Raju Kumar, Avinash Parashar\*  
Department of Mechanical and Industrial Engineering  
Indian Institute of Technology, Roorkee  
247667, Uttarakhand, India

\*Email: [avinash.parashar@me.iitr.ac.in](mailto:avinash.parashar@me.iitr.ac.in); Ph: +91-1332-284801

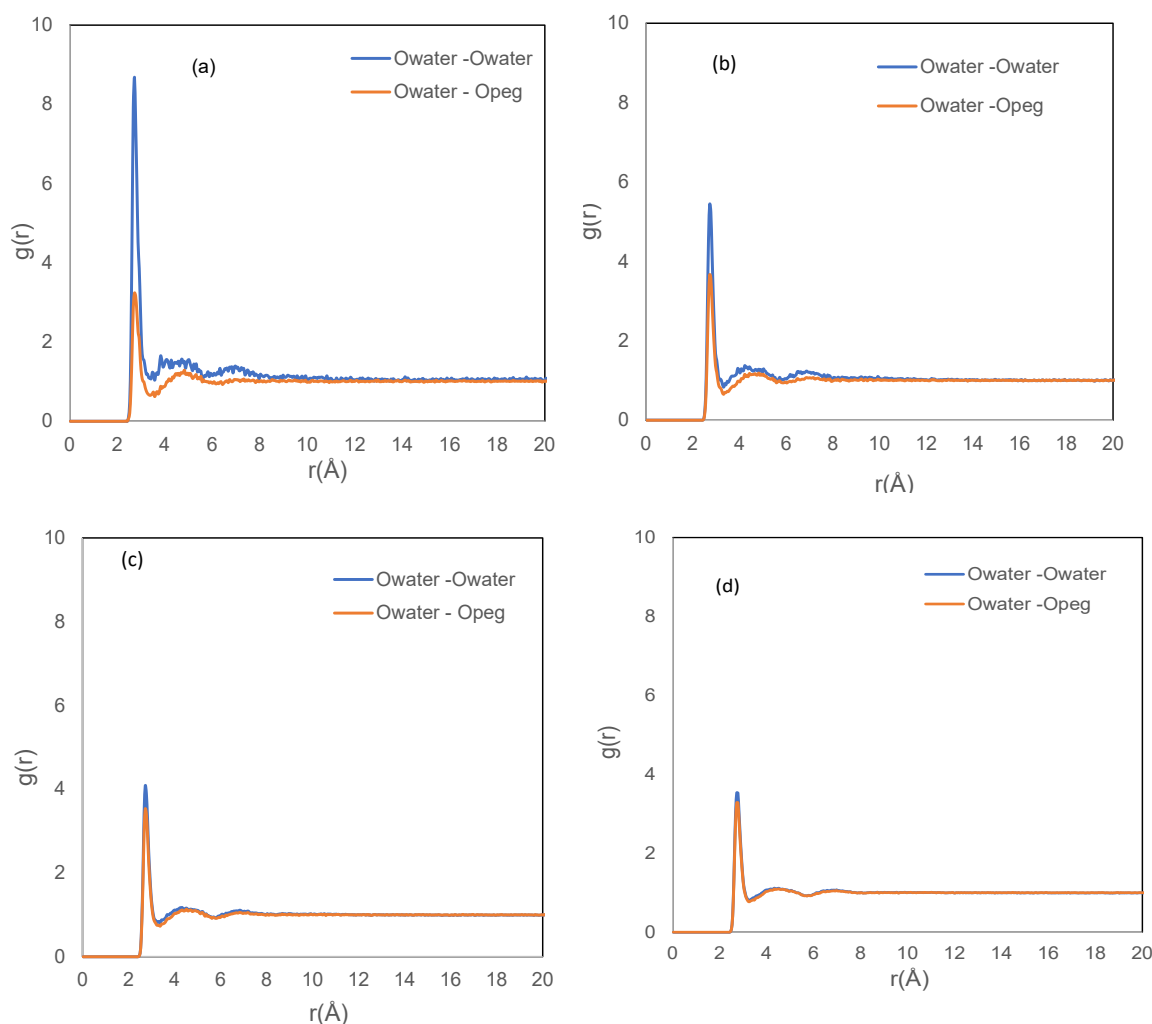

**Fig.S1** Representing the radial distribution function plots for PEGDA hydrogel between  $O_{water} - O_{water}$  and  $O_{water} - O_{peg}$  at (a) 25 wt.% (b) 50 wt.% (c) 75 wt.% (d) 85 wt.% water concentration.

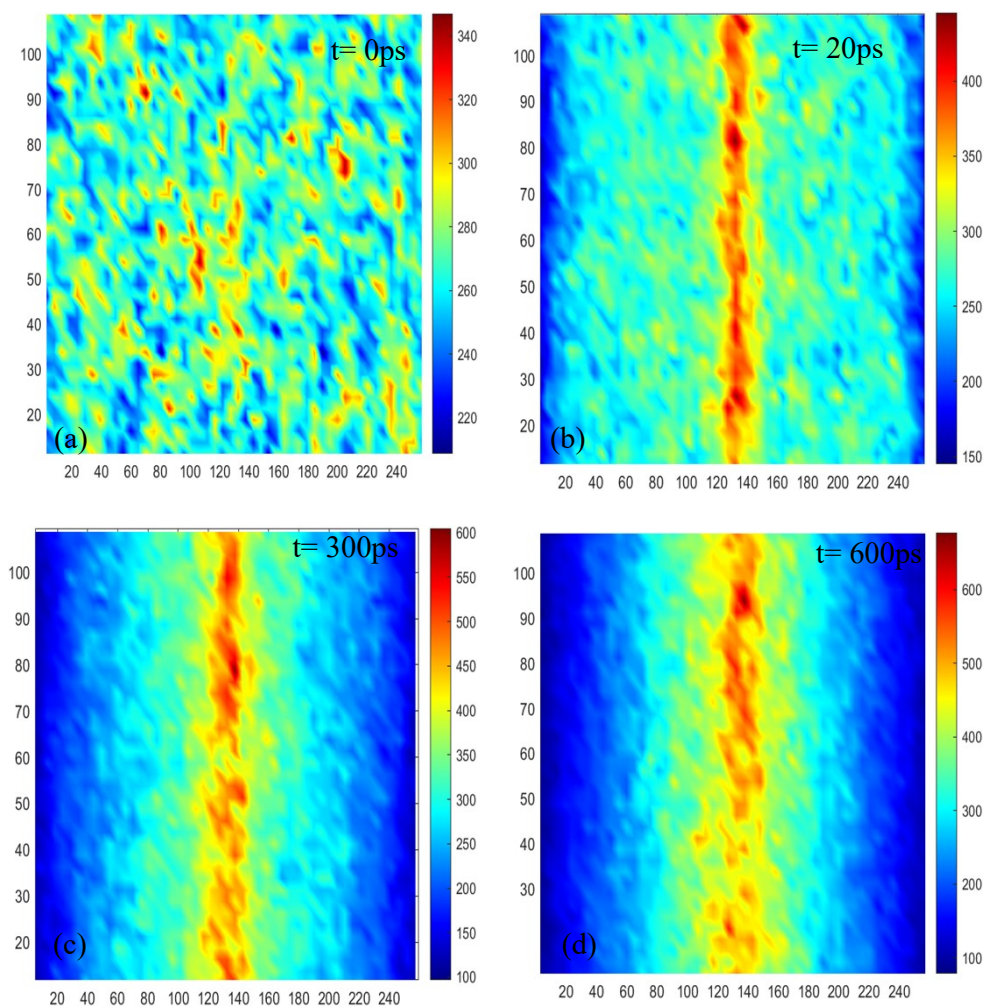

**Fig. S2** The variation of temperature distribution at different times of PEGDA-23. The steady-state temperature profile for PEGDA-23 helps in elucidating the fact that after 300 ps, the system equilibrium has been achieved, which can be verified at 600 ps.
